# Supplementary material
Source: publisher figshare collection journal article supplement (https://gsapubs.figshare.com/ndownloader/files/23316584)
Supplement: Supplementary file 1 [file 23316584]

## Sheet: Sheet1
TABLE DR2. U-Pb ISOTOPIC RATIOS AND AGES OF DETRITAL ZIRCONS FROM THE PALEOGENE LIUJIA FORMATION (CXN089) IN THE SOUTHWESTERN SICHUAN BASIN
Grain No.	Th232	U238	Th/U	Isotope ratios								Ages (Ma)
				Pb207/Pb206	±1σ	Pb207/U235	±1σ	Pb206/U238	±1σ	Pb208/Th232	±1σ	Pb207/Pb206	±1σ	Pb207/U235	±1σ	Pb206/U238	±1σ	Pb208/Th232	±1σ	Best age	±1σ	Con%
CXN089-01	79.07	138.11	0.5725	0.14036	0.00343	7.69184	0.1214	0.39751	0.00442	0.11586	0.00176	2232	13	2196	14	2158	20	2216	32	2232	13	103.429
CXN089-02	112.3	183.96	0.6105	0.05374	0.00249	0.20472	0.00851	0.02763	0.00035	0.00958	0.00021	360	71	189	7	176	2	193	4	176	2	107.386
CXN089-03	148.38	256.7	0.578	0.114	0.0026	5.17827	0.06744	0.3295	0.00327	0.0995	0.00116	1864	11	1849	11	1836	16	1917	21	1864	11	101.525
CXN089-04	185.91	185.72	1.001	0.05833	0.00194	0.55411	0.01491	0.06891	0.00077	0.02176	0.0003	542	39	448	10	430	5	435	6	430	5	104.186
CXN089-05	71.52	199.12	0.3592	0.11837	0.00285	5.65239	0.08572	0.3464	0.00367	0.09616	0.00155	1932	13	1924	13	1917	18	1856	29	1932	13	100.782
CXN089-06	88.41	159.94	0.5528	0.06779	0.0019	1.09541	0.02244	0.11722	0.00123	0.03579	0.00052	862	25	751	11	715	7	711	10	715	7	105.035
CXN089-07	67.75	83.62	0.8102	0.09737	0.003	3.64845	0.1038	0.27175	0.00319	0.07958	0.00083	1574	59	1560	23	1550	16	1548	15	1574	59	101.548
CXN089-08	97.85	607.45	0.1611	0.11575	0.00172	4.37549	0.05088	0.27416	0.00254	0.07887	0.00073	1892	27	1708	10	1562	13	1534	14	1892	27	121.127
CXN089-09	122.09	206.14	0.5923	0.05456	0.00189	0.22636	0.00647	0.0301	0.00033	0.00948	0.00018	394	44	207	5	191	2	191	4	191	2	108.377
CXN089-10	163.44	158.5	1.0312	0.09278	0.00239	3.07872	0.05445	0.24075	0.00259	0.07058	0.00086	1483	18	1427	14	1391	13	1378	16	1483	18	106.614
CXN089-11	234.84	289.59	0.8109	0.05458	0.00226	0.28551	0.01033	0.03796	0.00047	0.0117	0.00021	395	59	255	8	240	3	235	4	240	3	106.25
CXN089-12	270.21	353.78	0.7638	0.05924	0.00159	0.71616	0.01359	0.08772	0.00088	0.0274	0.00033	576	24	548	8	542	5	546	6	542	5	101.107
CXN089-13	60.36	80.41	0.7507	0.06234	0.00232	0.81598	0.02591	0.09498	0.00115	0.03179	0.00055	686	47	606	14	585	7	633	11	585	7	103.59
CXN089-14	397.95	325.87	1.2212	0.04867	0.00232	0.13157	0.00567	0.01961	0.00025	0.0063	0.00012	132	75	126	5	125	2	127	2	125	2	100.8
CXN089-15	38.68	188.96	0.2047	0.07247	0.00196	1.57851	0.03072	0.15805	0.00167	0.04853	0.00103	999	23	962	12	946	9	958	20	946	9	101.691
CXN089-16	102.9	150.44	0.684	0.08053	0.00207	2.22462	0.03944	0.20045	0.0021	0.06092	0.00079	1210	19	1189	12	1178	11	1195	15	1210	19	102.716
CXN089-17	255.75	509.27	0.5022	0.05174	0.00205	0.20823	0.00795	0.02919	0.00032	0.00917	8e-05	274	93	192	7	185	2	185	2	185	2	103.784
CXN089-18	474.34	807.19	0.5876	0.06123	0.00217	0.90757	0.03065	0.10751	0.00117	0.03312	0.0003	647	78	656	16	658	7	659	6	658	7	99.696
CXN089-19	39.92	47.42	0.8418	0.06603	0.00304	1.16996	0.04869	0.12858	0.00186	0.04218	0.0009	807	63	787	23	780	11	835	17	780	11	100.897
CXN089-20	195.11	182.67	1.0681	0.06732	0.00186	1.18051	0.02389	0.12726	0.00134	0.03948	0.00047	848	25	792	11	772	8	783	9	772	8	102.591
CXN089-21	60.05	228.17	0.2632	0.11577	0.00253	5.30399	0.06275	0.33248	0.0032	0.0908	0.00118	1892	10	1870	10	1850	15	1757	22	1892	10	102.27
CXN089-22	168.72	179.31	0.9409	0.05566	0.00209	0.36907	0.01188	0.04812	0.00057	0.01492	0.00023	439	50	319	9	303	4	299	5	303	4	105.281
CXN089-23	50.36	108.83	0.4627	0.05629	0.00292	0.35615	0.01696	0.04592	0.00065	0.01494	0.00044	464	80	309	13	289	4	300	9	289	4	106.92
CXN089-24	257.94	277.29	0.9302	0.0544	0.00167	0.47361	0.01144	0.06318	0.00067	0.02059	0.00026	388	35	394	8	395	4	412	5	395	4	99.7468
CXN089-25	51.03	60.2	0.8477	0.06385	0.00231	1.1045	0.03404	0.12553	0.00152	0.03911	0.00065	737	45	756	16	762	9	775	13	762	9	99.2126
CXN089-26	444.19	681.75	0.6515	0.0541	0.00148	0.23855	0.0048	0.032	0.00032	0.01075	0.00013	375	28	217	4	203	2	216	3	203	2	106.897
CXN089-27	124.07	212.68	0.5834	0.05847	0.00192	0.53141	0.01423	0.06596	0.00073	0.02035	0.00034	547	39	433	9	412	4	407	7	412	4	105.097
CXN089-28	62.44	116.99	0.5337	0.06488	0.00252	1.16053	0.04311	0.12973	0.00149	0.0397	0.00039	770	84	782	20	786	9	787	8	786	9	99.4911
CXN089-29	56.72	589.88	0.0962	0.11383	0.00242	4.7881	0.05257	0.30527	0.00287	0.08797	0.00125	1861	9	1783	9	1717	14	1704	23	1861	9	108.387
CXN089-30	290.54	370.33	0.7845	0.05083	0.00218	0.24204	0.00924	0.03456	0.00043	0.01064	0.0002	233	65	220	8	219	3	214	4	219	3	100.457
CXN089-31	107.72	952.14	0.1131	0.11693	0.00242	5.50433	0.05446	0.34162	0.00314	0.10397	0.00113	1910	8	1901	9	1894	15	1999	21	1910	8	100.845
CXN089-32	70.33	120.23	0.585	0.11865	0.00266	5.54388	0.07279	0.3391	0.0034	0.09383	0.0011	1936	11	1907	11	1882	16	1813	20	1936	11	102.869
CXN089-33	193.17	227.18	0.8503	0.05382	0.00189	0.42858	0.01264	0.05779	0.00065	0.0184	0.00027	364	46	362	9	362	4	369	5	362	4	100
CXN089-34	158.12	330.13	0.479	0.05275	0.00179	0.23735	0.00667	0.03265	0.00036	0.0105	0.00018	318	44	216	5	207	2	211	4	207	2	104.348
CXN089-35	293.64	926.71	0.3169	0.04975	0.00135	0.17779	0.00354	0.02594	0.00026	0.00884	0.00013	183	28	166	3	165	2	178	3	165	2	100.606
CXN089-36	123.67	137.69	0.8982	0.05707	0.00289	0.42816	0.02108	0.05442	0.00066	0.0169	0.00015	494	115	362	15	342	4	339	3	342	4	105.848
CXN089-37	88.33	150.28	0.5878	0.16328	0.0035	10.5365	0.12311	0.46834	0.00465	0.13909	0.00155	2490	9	2483	11	2476	20	2632	28	2490	9	100.565
CXN089-38	56.09	85.34	0.6573	0.13458	0.00307	7.32774	0.10354	0.39516	0.00417	0.107	0.00138	2159	12	2152	13	2147	19	2055	25	2159	12	100.559
CXN089-39	83.85	253.39	0.3309	0.07018	0.00171	1.47021	0.02387	0.15204	0.00151	0.04913	0.00068	934	18	918	10	912	8	969	13	912	8	100.658
CXN089-40	70.57	146.51	0.4817	0.15129	0.00335	4.97079	0.06354	0.23846	0.00239	0.06188	0.00081	2361	10	1814	11	1379	12	1214	15	2361	10	171.211
CXN089-41	224.49	277.49	0.809	0.07499	0.00169	1.7846	0.0239	0.17272	0.00165	0.04996	0.0005	1068	13	1040	9	1027	9	985	10	1068	13	103.992
CXN089-42	95.24	128	0.7441	0.0676	0.00212	1.23899	0.03132	0.13303	0.00153	0.04198	0.00064	856	33	818	14	805	9	831	12	805	9	101.615
CXN089-43	429.8	662.3	0.649	0.05142	0.00133	0.31763	0.00579	0.04483	0.00044	0.01459	0.00016	260	24	280	4	283	3	293	3	283	3	98.9399
CXN089-44	95.76	160.26	0.5975	0.05249	0.0025	0.27439	0.01189	0.03794	0.0005	0.01132	0.00026	307	75	246	9	240	3	228	5	240	3	102.5
CXN089-45	56.7	155.31	0.3651	0.05318	0.00187	0.43724	0.013	0.05967	0.00067	0.01954	0.0004	336	47	368	9	374	4	391	8	374	4	98.3957
CXN089-46	53.52	589.69	0.0908	0.11345	0.00232	5.13138	0.05104	0.32825	0.00302	0.09452	0.00117	1855	8	1841	8	1830	15	1825	22	1855	8	101.366
CXN089-47	59.29	47.69	1.2432	0.16244	0.00372	10.3831	0.15234	0.46388	0.00517	0.12503	0.00147	2481	12	2470	14	2457	23	2381	26	2481	12	100.977
CXN089-48	108.22	171.9	0.6296	0.11411	0.00268	5.1132	0.07849	0.32519	0.00346	0.08409	0.00112	1866	14	1838	13	1815	17	1632	21	1866	14	102.81
CXN089-49	76.28	228.06	0.3345	0.06482	0.00161	1.11689	0.019	0.12505	0.00124	0.03682	0.00054	768	20	761	9	760	7	731	11	760	7	100.132
CXN089-50	246.68	85.23	2.8943	0.05824	0.00215	0.72955	0.02317	0.09091	0.00109	0.02539	0.00029	539	48	556	14	561	6	507	6	561	6	99.1087
CXN089-51	265.94	503.57	0.5281	0.05128	0.00152	0.22346	0.00519	0.03162	0.00032	0.01001	0.00014	253	35	205	4	201	2	201	3	201	2	101.99
CXN089-52	47.79	316.76	0.1509	0.1202	0.00248	5.86545	0.0616	0.35412	0.00331	0.14281	0.00169	1959	8	1956	9	1954	16	2698	30	1959	8	100.256
CXN089-53	62.45	161.54	0.3866	0.12241	0.00272	6.10001	0.08194	0.36163	0.00369	0.10185	0.0014	1992	11	1990	12	1990	17	1960	26	1992	11	100.101
CXN089-54	294.73	417.9	0.7053	0.05191	0.00193	0.24421	0.00783	0.03414	0.00039	0.01045	0.00017	281	52	222	6	216	2	210	3	216	2	102.778
CXN089-55	503.6	669.65	0.752	0.05175	0.00138	0.27525	0.00537	0.0386	0.00038	0.01177	0.00013	274	27	247	4	244	2	237	3	244	2	101.23
CXN089-56	81.1	168.79	0.4805	0.14489	0.00306	8.44958	0.09818	0.4232	0.00416	0.11362	0.00131	2286	9	2281	11	2275	19	2175	24	2286	9	100.484
CXN089-57	162.01	250.13	0.6477	0.11077	0.00231	4.90269	0.05473	0.32118	0.00304	0.08862	0.00086	1812	9	1803	9	1795	15	1716	16	1812	9	100.947
CXN089-58	49.9	146.64	0.3403	0.08823	0.002	2.82187	0.03995	0.23209	0.0023	0.06661	0.0009	1387	13	1361	11	1345	12	1303	17	1387	13	103.123
CXN089-59	127.02	117.61	1.08	0.06395	0.00216	1.06517	0.03017	0.12086	0.00143	0.03618	0.00053	740	40	736	15	736	8	718	10	736	8	100
CXN089-60	123.61	104.67	1.1809	0.05195	0.00338	0.27079	0.01664	0.03782	0.00062	0.0113	0.00026	283	111	243	13	239	4	227	5	239	4	101.674
CXN089-61	57.61	94.5	0.6096	0.06396	0.00188	1.1257	0.02618	0.12772	0.0014	0.03827	0.00058	740	31	766	13	775	8	759	11	775	8	98.8387
CXN089-62	250.4	192.5	1.3008	0.05584	0.00237	0.28564	0.01081	0.03712	0.00047	0.01125	0.00019	446	61	255	9	235	3	226	4	235	3	108.511
CXN089-63	92.74	121.75	0.7617	0.06538	0.00198	1.1639	0.02836	0.12918	0.00146	0.03748	0.00052	787	32	784	13	783	8	744	10	783	8	100.128
CXN089-64	54.33	201.01	0.2703	0.11191	0.00241	5.02021	0.06332	0.32549	0.00321	0.09165	0.00126	1831	11	1823	11	1816	16	1772	23	1831	11	100.826
CXN089-65	268.43	374.89	0.716	0.0726	0.00164	1.68694	0.02373	0.1686	0.00163	0.04788	0.0005	1003	14	1004	9	1004	9	945	10	1003	14	99.9004
CXN089-66	50.8	104.69	0.4852	0.14093	0.00297	7.98757	0.09437	0.41123	0.00406	0.10936	0.00128	2239	9	2230	11	2221	19	2098	23	2239	9	100.81
CXN089-67	154.99	302.28	0.5127	0.05012	0.0017	0.27911	0.00797	0.0404	0.00044	0.01179	0.0002	201	46	250	6	255	3	237	4	255	3	98.0392
CXN089-68	335.76	559.28	0.6003	0.05707	0.00136	0.50663	0.00811	0.06441	0.00062	0.01986	0.00021	494	19	416	5	402	4	397	4	402	4	103.483
CXN089-69	168.83	356.66	0.4734	0.05019	0.00166	0.2254	0.0062	0.03259	0.00035	0.00983	0.00017	204	44	206	5	207	2	198	3	207	2	99.5169
CXN089-70	148.55	152.34	0.9751	0.12756	0.00269	6.59593	0.07924	0.37515	0.00369	0.10055	0.00099	2065	10	2059	11	2054	17	1937	18	2065	10	100.536
CXN089-71	78.54	312.81	0.2511	0.0523	0.00155	0.34341	0.0081	0.04764	0.0005	0.01404	0.00028	299	35	300	6	300	3	282	6	300	3	100
CXN089-72	96.28	161.63	0.5957	0.05718	0.00161	0.7844	0.01707	0.09952	0.00104	0.02903	0.0004	498	30	588	10	612	6	578	8	612	6	96.0784
CXN089-73	76.83	80.6	0.9532	0.06267	0.00222	0.85906	0.02613	0.09944	0.0012	0.0294	0.00046	697	44	630	14	611	7	586	9	611	7	103.11
CXN089-74	33.04	32.05	1.0309	0.11957	0.00311	5.75773	0.11259	0.34932	0.00426	0.09292	0.00134	1950	18	1940	17	1931	20	1796	25	1950	18	100.984
CXN089-75	64.1	300.69	0.2132	0.10856	0.00223	4.62718	0.05094	0.3092	0.00291	0.08203	0.00105	1775	9	1754	9	1737	14	1594	20	1775	9	102.188
CXN089-76	26.01	97.29	0.2673	0.05908	0.00198	0.79367	0.02238	0.09744	0.00113	0.02856	0.00073	570	41	593	13	599	7	569	14	599	7	98.9983
CXN089-77	35.94	220.6	0.1629	0.10708	0.00241	4.4696	0.06419	0.30278	0.00311	0.07144	0.00144	1750	13	1725	12	1705	15	1395	27	1750	13	102.639
CXN089-78	166.45	214.16	0.7772	0.05082	0.00201	0.25296	0.00883	0.03611	0.00043	0.01045	0.00018	233	58	229	7	229	3	210	4	229	3	100
CXN089-79	159.13	140.31	1.1341	0.06246	0.00173	1.06063	0.02267	0.12317	0.0013	0.03587	0.00041	690	28	734	11	749	7	712	8	749	7	97.9973
CXN089-80	54.78	129.67	0.4225	0.15442	0.00318	9.50531	0.10864	0.44646	0.0044	0.116	0.0014	2395	9	2388	11	2379	20	2218	25	2395	9	100.673
CXN089-81	186.2	257.74	0.7224	0.06218	0.00147	1.03938	0.01668	0.12124	0.00118	0.03483	0.00037	680	18	724	8	738	7	692	7	738	7	98.103
CXN089-82	156.41	440.12	0.3554	0.06498	0.00149	1.07099	0.01615	0.11954	0.00115	0.03532	0.00043	774	17	739	8	728	7	702	8	728	7	101.511
CXN089-83	328.8	521.61	0.6304	0.06681	0.00465	0.27256	0.01866	0.02959	0.00036	0.00903	0.00016	832	149	245	15	188	2	182	3	188	2	130.319
CXN089-84	330.69	276.75	1.1949	0.06171	0.00145	0.99522	0.01583	0.11697	0.00114	0.03246	0.00031	664	18	701	8	713	7	646	6	713	7	98.317
CXN089-85	84.42	63.54	1.3286	0.05166	0.00352	0.28658	0.01861	0.04023	0.00065	0.01175	0.00026	270	119	256	15	254	4	236	5	254	4	100.787
CXN089-86	423.85	422.33	1.0036	0.10969	0.00236	4.43215	0.05795	0.29301	0.00291	0.08599	0.00085	1794	11	1718	11	1657	15	1667	16	1794	11	108.268
CXN089-87	329.14	426.66	0.7714	0.07428	0.00166	1.7932	0.02543	0.17505	0.0017	0.05054	0.00051	1049	14	1043	9	1040	9	997	10	1049	14	100.865
CXN089-88	89.6	297.7	0.301	0.05178	0.00194	0.31735	0.0104	0.04444	0.00052	0.01307	0.00033	276	53	280	8	280	3	262	7	280	3	100
CXN089-89	158.46	354.15	0.4474	0.04936	0.00151	0.26884	0.00671	0.03949	0.00041	0.01195	0.00019	165	39	242	5	250	3	240	4	250	3	96.8
CXN089-90	50.96	155.41	0.3279	0.05759	0.00261	0.66432	0.02878	0.08366	0.00109	0.02596	0.00027	514	102	517	18	518	7	518	5	518	7	99.8069
CXN089-91	83.94	97.83	0.858	0.06642	0.00243	1.31157	0.04193	0.14317	0.00187	0.04094	0.00073	820	45	851	18	863	11	811	14	863	11	98.6095
CXN089-92	36.58	373.97	0.0978	0.04983	0.00151	0.26132	0.00646	0.03803	0.0004	0.0141	0.0004	187	38	236	5	241	2	283	8	241	2	97.9253
CXN089-93	103.6	274.2	0.3778	0.04719	0.00169	0.21962	0.00681	0.03374	0.00037	0.00998	0.0002	59	50	202	6	214	2	201	4	214	2	94.3925
CXN089-94	61.18	58.51	1.0456	0.10437	0.003	4.31469	0.10021	0.29972	0.00391	0.08092	0.00128	1703	24	1696	19	1690	19	1573	24	1703	24	100.769
CXN089-95	320.36	562.34	0.5697	0.04655	0.00133	0.21209	0.0048	0.03303	0.00033	0.01005	0.00013	26	32	195	4	209	2	202	3	209	2	93.3014
CXN089-96	183.66	144.93	1.2672	0.06125	0.00162	1.03514	0.02074	0.12252	0.00127	0.03378	0.00036	648	26	721	10	745	7	671	7	745	7	96.7785
